# Supplementary material
Source: PubMed Central journal article supplement (PMC4764097)
Supplement: NIHMS726091-supplement-supplement_1.pdf [file NIHMS726091-supplement-supplement_1.pdf]

## Fig. S1

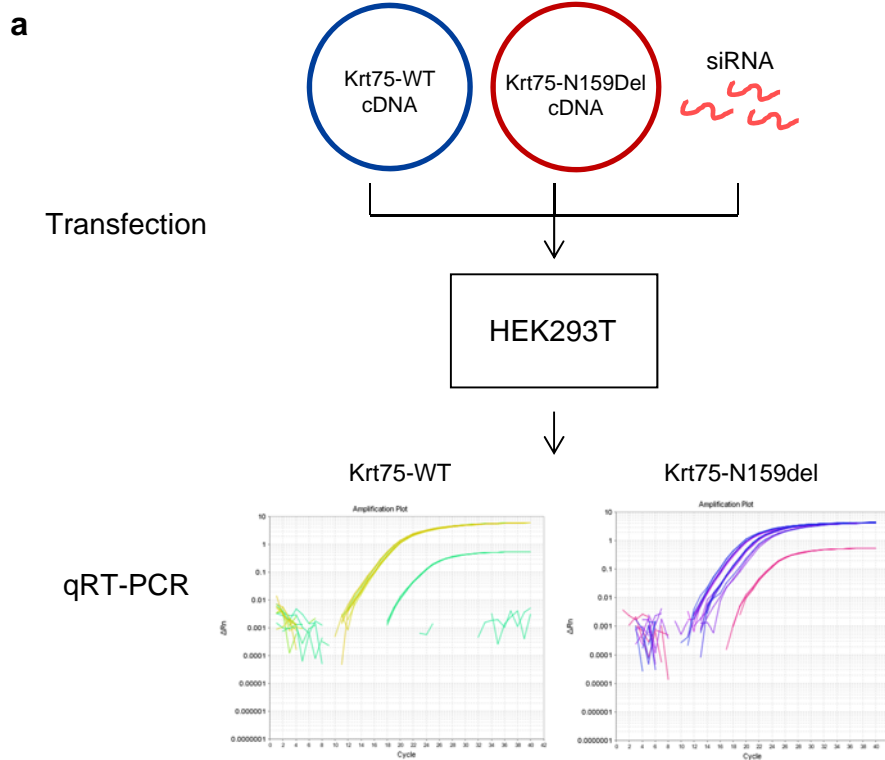

**b**

Primers:  
 Krt75-F: 5'-gggtgcggaaagaagaacg-3'  
 Krt75-R: 5'-aggttctgtctgactgtcctagagc-3'

Probes:  
 Krt75-WT: FAM-TGAACAACAAGTTCGC  
 Krt75-N159del: HEX-CTCTGAACAAGTTCGC

**Supplemental Figure S1. Screening procedure of siRNA.** (a) Outline of co-transfection and qRT-PCR. (b) Sequence of primers and probes used in qRT-PCR.

## Fig. S2

a

Krt75-N159del-6 shRNA:

5' - CGCGTTCAAGACTCTGAACAAGTTTTCAAGAGAACTTGTTTCAGAGTCTTGATTTTTAT-3'

Krt75-N159del-6S shRNA:

5' - CGCGTGCACATACTGAAGTTCTAATTCAAGAGATTAGAACTTCAGTATGTGCTTTTTAT-3'

b

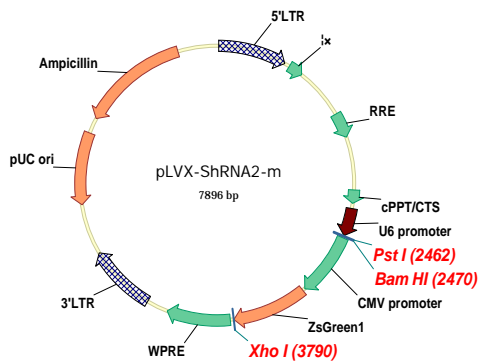

c

HEK293T

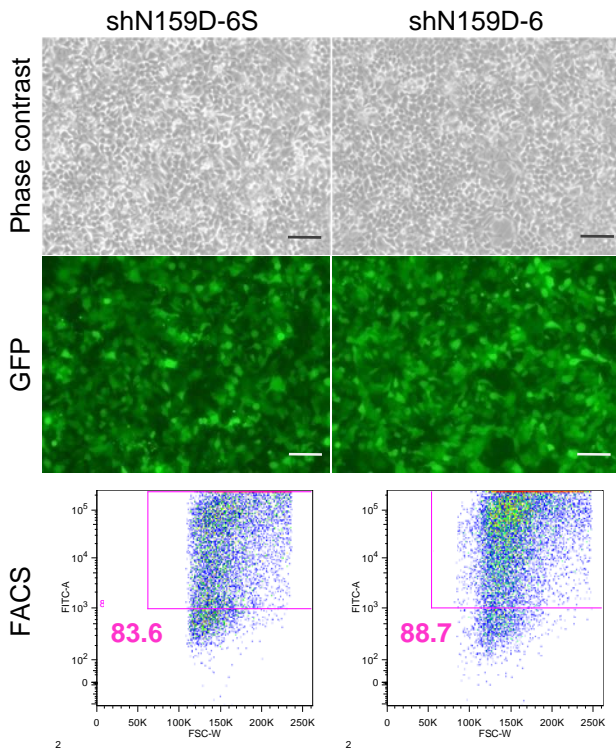

d

Primary Keratinocytes

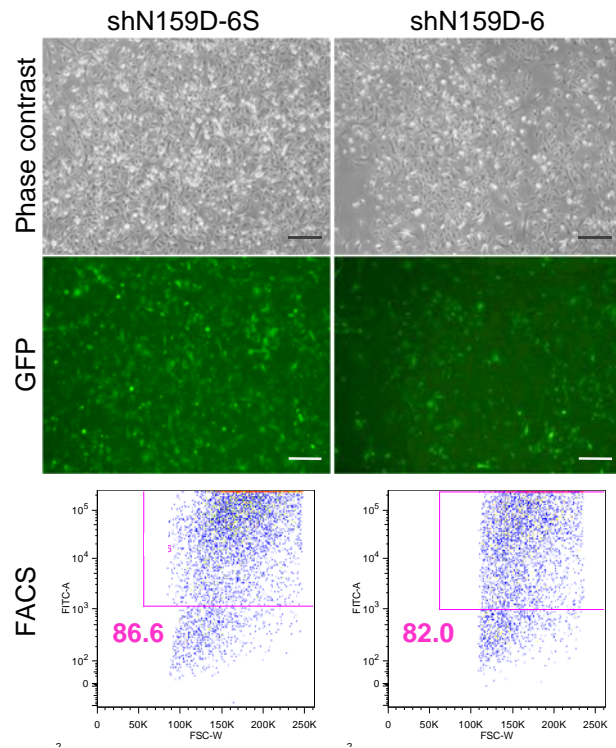

**Supplemental Figure S2. Construction of lentiviral vector and viral infection.** (a) Sequence of oligos (sense) used in cloning shRNAs into pLVTHM lentiviral vector. (b) Map of lentiviral transferring vector. shRNA was inserted between Pst I and BamH I sites. (c–d) Infection of HEK293T (b) and primary keratinocytes isolated from mutant *Krt75* mice (c) at 48 hours post-infection. FACS analyses showed that >82% cells were infected with lentivirus. Scale bar: 100  $\mu$ m.

Fig. S3

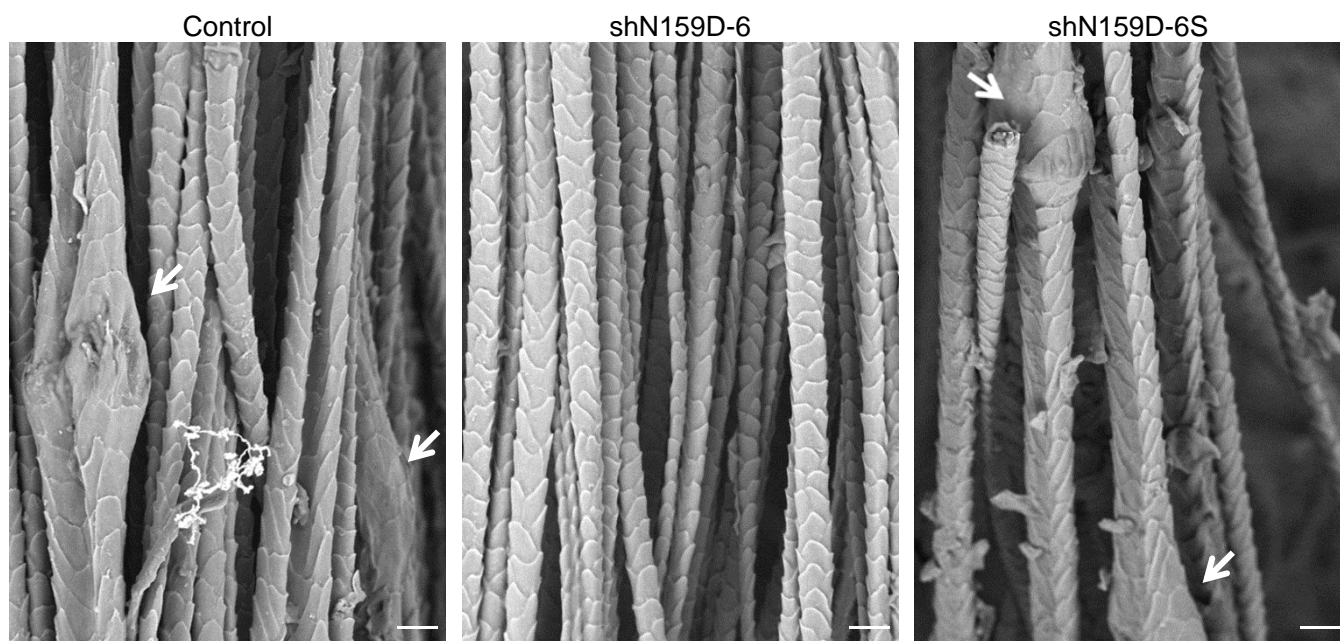

**Supplemental Figure S3. Examination of hair shaft by scanning electron microscopy.**

Representative micrographs of hair regenerated with homozygous mutant *Krt75* keratinocyte progenitor cells that were not infected with lentiviral vector (Control), shD159D-6 lentiviral vector, or scrambled (shD159D-6S) lentiviral vector. Arrows point to blebs characteristic of mutant *Krt75* mice. Scale bar: 20  $\mu\text{m}$ .

Fig. S4

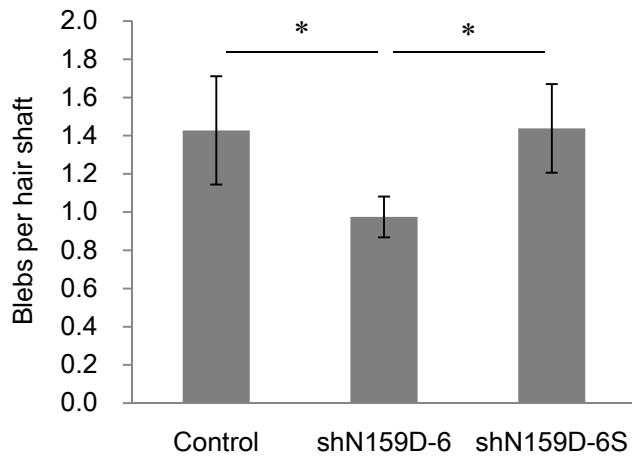

**Supplemental Figure S4. Number of blebs per hair shaft at one month post-grafting.** Hair regenerated with non-infected cells (Control), shN159D-6 lentiviral vector infected cells, and scrambled (shN159D-6S) lentiviral vector-infected cells contained  $1.43 \pm 0.28$ ,  $0.97 \pm 0.11$ , and  $1.44 \pm 0.23$  blebs per hair shaft, respectively, at one-month after grafting. Asterisk,  $P < 0.01$ .

Fig. S5

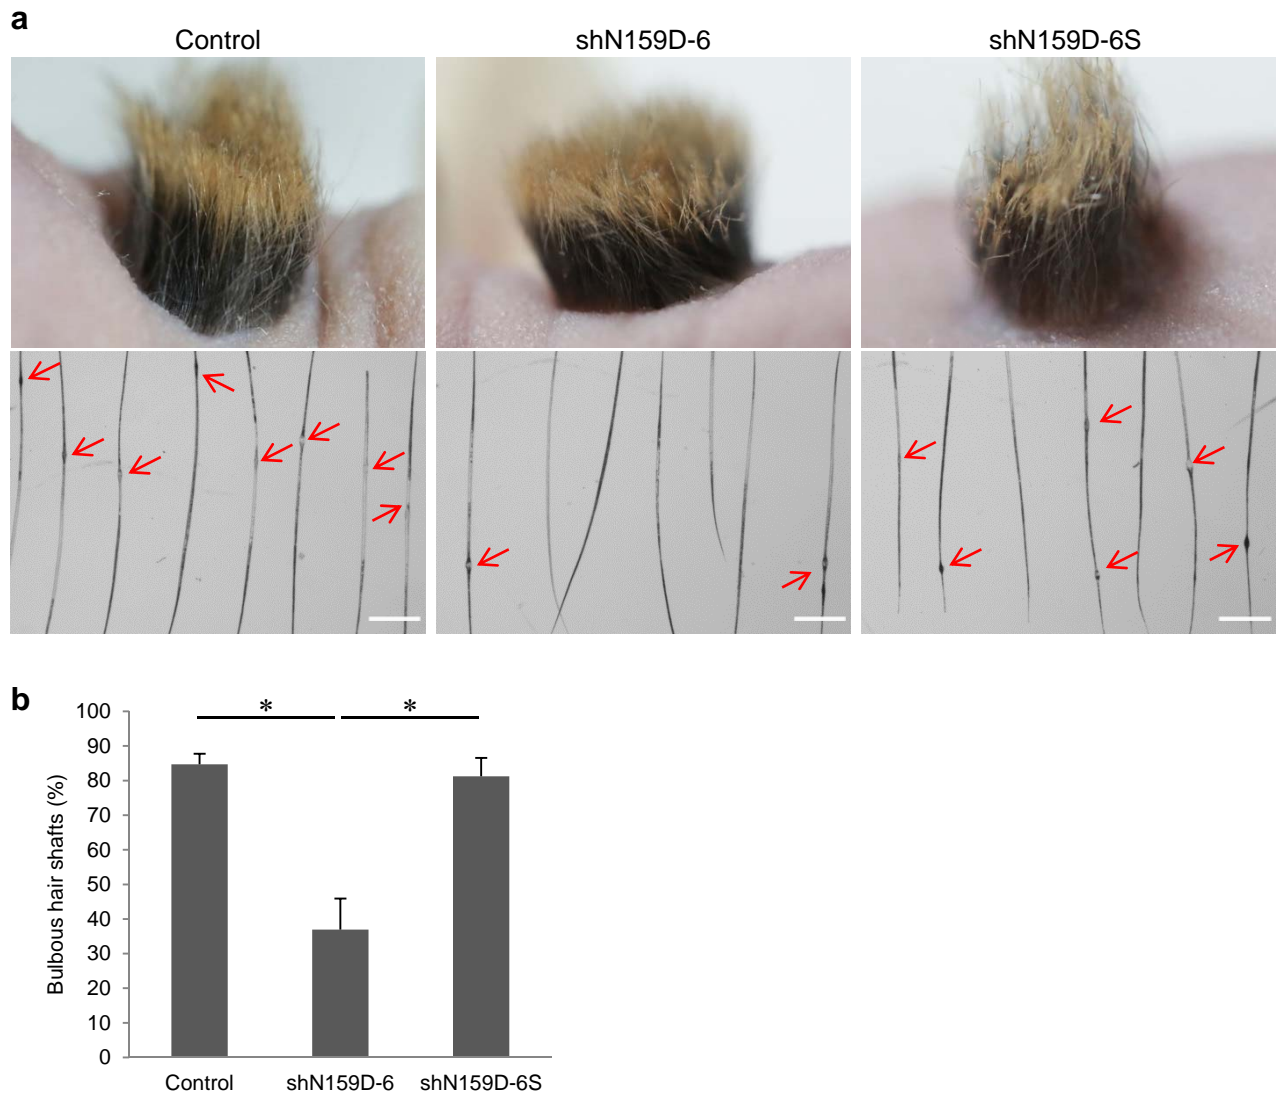

**Supplemental Figure S5. Phenotypes of hair regenerated with shRNA-modified homozygous mutant *Krt75* keratinocyte progenitor cells at 3 months post-grafting.** (a) Representative appearance of hair regenerated with non-infected cells (a, Control), shN159D-6 lentiviral vector-infected cells (b), and scrambled (shN159D-6S) lentiviral vector-infected cells (c) at three months of grafting. Arrows point to bulbous lesions along the hair shaft. (b) Quantification of hair shafts containing blebs. Asterisk,  $P < 0.05$ . Scale bar: 500  $\mu\text{m}$ .
